# Supplementary material for: TG1050, an immunotherapeutic to treat chronic hepatitis B, induces robust T cells and exerts an antiviral effect in HBV-persistent mice
Source: PubMed Central journal article supplement — Gut. 2014 Nov 26;64(12):1961–71. doi: 10.1136/gutjnl-2014-308041 (PMC4680198; doi:10.1136/gutjnl-2014-308041), 2014-11-26

## **Supplementary**

### **Supplementary Material and Methods**

#### **Cells**

The human lung carcinoma A549 cell line (ATCC, CCL-185) and the human embryonic kidney HEK 293 cell line (ATCC, CRL-1573) were used.

#### **Western-blot analysis for HBV protein expression**

Monolayers of A549 cells were mock-infected with AdTG15149 or infected at 250 Infectious Unit (IU) /cell with TG1050. MG132 (proteasome inhibitor, 10  $\mu$ M) was added 18 h post-infection and 48 h post-infection, cells were lysed and analyzed by Western-blot using mouse monoclonal antibody anti-Pol Hep B Pol 2C8 (that recognizes aa 8-20 of the Polymerase) (Santa Cruz). Mouse monoclonal antibody anti-Pol Hep B 8D5 (that recognizes aa 225-250 of the Polymerase) and mouse monoclonal anti-Core HepB C1-5 (that recognizes aa 70-80 of the Core) (Santa Cruz) were also used (data not shown). A goat anti-mouse HRP conjugated antibody (DakoCytomation) was used as secondary antibody and immunocomplexes were detected using an enhanced HRP-luminol chemiluminescence system (Immune-Star Western-C, BIO-RAD).

#### **2D gel electrophoresis and LC-MS/MS**

2D gel electrophoresis samples were overall prepared as for western blot analysis experiments with few changes: HEK 293 cells were infected and lysed by 2D lysis buffer (9M Urea, 2M Thiourea, 4% CHAPS and 60 mM DTT). Each strip (Biorad *ReadStrip<sup>TM</sup> IPG Strip* 17cm pH 3-10 L) was loaded with one mg of protein, isofocalized and then transferred on a 12% SDS-PAGE for a 2<sup>nd</sup> dimension separation.

Gels were either stained with Coomassie Instantblue™ overnight or blotted on PVDF membranes, incubated with 2C8 monoclonal antibody as described above and developed with colorimetric substrate 4CN (Biorad). Total protein spots on blots were developed using colloidal gold staining (Biorad). Areas on Coomassie stained gels corresponding to immunoreactive spots were located and 4 to 14 pieces of gel/area were excised for mass spectrometry analysis. Gel pieces were treated by either trypsin or pepsin after reduction and alkylation. Resulting peptides were directly analyzed by nanoLC-MS/MS on a nanoACQUITY Ultra-Performance-LC (UPLC, Waters, Milford, MA) equipped with C18 precolumn (Waters Corp.), and an analytical BEH130 C18 column (Waters Corp.), 75 µm x 250 mm, 1.7 µm particle size. The MS and MS/MS analyzes were performed on the SYNAPT™ (Waters, Milford, MA).<sup>26</sup> Data were interpreted using Mascot (version 2.4.1, Matrix science, London, England) and Scaffold 3 (version 3.6.5; Proteome Software Inc., Portland, OR, USA) software was used to identify proteins and hits corresponding to the TG1050 primary structures (deduced from the 6 possible reading frames).

**Mice.** All mice were used following the requirement of the CEE directive 86/6009 and French law. From 1st February 2013, the CEE directive 2010/63/UE of 22th September 2010 and the French décret n° 2013-118 of 1st February 2013 were applied. BALB/c, C57BL/6J and HLA-A\*0201 transgenic, H-2 class I KO mice (HLA-A2 mice),<sup>18</sup> were housed for experiments at the Plateau de Biologie Expérimentale de la Souris (PBES, Lyon, France) while HLA-A\*0201/DRB1\*0101 transgenic, H-2 class I/class II KO mice (HLA-A2/DR1 mice),<sup>19</sup> were housed in the animal facility of Institut Pasteur (Paris, France).

**Peptides.** Synthetic peptide libraries were synthesized by ProImmune with Prospector™ LCMS Crude technique. Two pools of peptides covering the Core protein, 9 pools of peptides covering the Polymerase, 1 pool covering Env1 and 1 pool covering Env2 were composed (comprising from 9 to 25 peptides).

### ***In vivo* CTL assays**

*In vivo* CTL assays were performed as described by Fournillier *et al.*,<sup>24</sup>. Of note, for BALB/C and C57BL/6J mouse experiments pulsed and unpulsed cells were respectively stained with 2 and 16 μM of CFSE.

### **HBV-DNA qRT-PCR**

Viral DNA from 50 μL mouse plasma samples has been purified using the MagMAX™-96 Viral RNA/DNA Isolation Kit (Ambion) according to manufacturer's specifications. Purified viral DNA has been resuspended in 50 μL of elution buffer. Five μL (diluted 10x in H<sub>2</sub>O) were tested for HBV-specific DNA by qRT-PCR in a 20 μL reaction using the GeneSig HBV qPCR kit (PrimerDesign™Ltd) according to manufacturer's instructions on a 7500HT Real-Time PCR System (Applied Biosystems). Analysis was performed using SDS v2.0.6 software (Applied Biosystems).

### **Triple Intracellular Cytokine Staining Assays (IFN $\gamma$ /TNF $\alpha$ /IL2)**

Livers were collected 15 days after adenovirus injection. Red blood cells were lysed and liver infiltrating lymphocytes were incubated in supplemented  $\alpha$ MEM culture medium in presence of 1μM of VSA (VSAAFYHLPL) peptide and GolgiPlug. After 5h at 37°C and overnight at 4°C cells were washed with 1 % FCS-PBS and incubated with anti-CD16/CD32 (clone

2.4G2) for 10min at 4°C. Then 1 % FCS-PBS containing Live/Dead Violet and monoclonal antibodies against CD4-V500 (RM4.5) and CD8a-APC-H7 (53-6.7) were incubated 30min at 4°C. After washes, cells were fixed and permeabilized for 20min at room temperature with Cytotfix/Cytoperm and washed with Perm/Wash solution. Perm/Wash solution containing monoclonal antibodies against CD3-PerCP (145-2C11), IFN $\gamma$ -A488 (XMG1.2), IL2-PE (JES6-5H4) and TNF $\alpha$ -APC (MP6-XT22) were incubated 30 min at 4°C. After washes, cells were resuspended in 1% FCS-PBS and analyzed by flow cytometry using a BD FACS Canto II cytometer. A technical cut-off value was determined as 25 x 100/average number of CD3e+, CD8 $\alpha$ + or CD4+ cells. Additionally an experimental cut-off value was calculated as 3 times the standard deviation (SD) of values obtained without stimulation (medium). A response was then considered as positive if the percentage of cytokine-positive cells was higher than both cut-off values.

## **Supplementary Figures and Tables**

### **Figure S1 (-A, -B and -C): TG1050 *in vitro* and biochemical characterization**

Expression of the HBV fusion protein by TG1050 was assessed by Western Blot (**S1-A**) and analysed using mouse monoclonal anti-Pol Hep B Pol 2C8 antibody. Arrow on the right indicates the position of the full length Core-Pol-Env protein. Proteomic analysis of 2C8 immunoreactive protein species was performed (**S1-B**). Z1, Z2 and Z3 displayed respectively apparent MWs of 24 kDa and an isoelectric point (pI) of  $\sim 5 \pm 0.5$ , 13 kDa and pI of  $\sim 5.5 \pm 0.5$  and 24 kDa and undetermined pI (no isofocalization). Sequences obtained after trypsin or pepsin digestions and identified by LC-MS/MS analysis are shown (**S1-C**). Peptides corresponding to TG1050 polyprotein were reported on the partial sequence in green, orange and red for sequences respectively identified after pepsin treatment only, after pepsin and trypsin treatments and after trypsin treatment only. Epitope recognized by the 2C8 antibody is

underlined. All peptides matched the sequence of the expected reading frame but only covered the first 202 residues of the fusion protein. Peptides from Z1 and Z3 regions covered similar parts of the TG1050 HBV fusion protein (i.e. from F24 and D29, respectively for Z1 and Z3, to K202) potentially representing the same protein isofocalized and non isofocalized respectively. The difference of coverage observed between Z1 and Z3 could be explained by a difference of both quantity and purity of the same immunoreactive protein in the two zones. Z2-generated peptides covered a more restricted portion of the polyprotein than Z1/Z3 (from W71 to K202). It could be hypothesized that the main 2C8 immunoreactive products in Z1 Z2 and Z3 correspond to stable degradation products of the polyprotein that accumulate in the cell. The major immunoreactive 2C8 product in Z1 and Z3 regions could correspond to the first ~210 residues of the fusion protein containing a nearly intact core and the 50-60 first residues of Pol (calculated MW of 24 kDa and pI of 4.9). Z2 could be a more degraded product than Z1/Z3, lacking the first 50-60 residues of the polyprotein (calculated MW of 15 kDa and pI of 5.3). This N-terminal degradation could explain both the vertical (24 to 15 kDa) and horizontal (pI 4.9 to 5.3) migration shifts of Z2 versus Z1.

**Figure S2: Analysis of induced T cell responses following single injection of TG1050 using IFN $\gamma$  ELISPOT assay.** HLA-A2 transgenic (2A), C57BL/6J (2B) and BALB/c (2C) mice were immunized once subcutaneously with TG1050 or an empty Ad (negative control). IFN $\gamma$  ELISPOT assays were realized using spleen cells and pools of overlapping peptides covering respectively the HBV Core protein (PC1, PC2), the 2 Env domains (PE1, PE2) and the HBV polymerase protein (PP0 – PP8), or irrelevant peptides (IRR) or medium alone (MED). Each individual mouse is represented by a dot, median values are represented by the bar.

**Figure S3: Analysis of induced *in vivo* cytolytic T cell responses following single injection of TG1050 in HLA-A2 transgenic, C57BL/6J and BALB/C mice.** HLA-A2 transgenic mice or C57BL/6J or BALB/c mice were immunized once with TG1050 or an empty Adenovirus (negative control) and induced HBV-specific immune responses were monitored on spleen cells using *in vivo* CTL assays performed as described in Material and methods. An example of overlay histograms obtained in each mouse strain for one of the tested peptide (SLY for HLA-A2 mice (**S3A**), N13F for C57BL/6J mice (**S3B**) and HYF for BALB/c mice (**S3C**)) is shown, the plain grey histogram corresponding to an empty Ad immunized mouse injected with unloaded cells and HBV peptide loaded cells and the unfilled black line histogram corresponding to a TG1050 immunized mouse injected with unloaded cells and HBV peptide loaded cells. Percentages of specific *in vivo* cytotoxicity obtained for various HBV peptides in each mouse strain are represented after TG1050 or empty Ad immunization. Each empty or plain circle represents an individual mouse immunized respectively with empty Ad or TG1050. Black lines represent the mean values of each group for each tested HBV peptide. Dotted lines represent cut-off values for each peptide, being defined by mean value of the percentages of specific lysis obtained with mice immunized with empty Ad for each peptide + three times the standard deviation.

**Figure S4: Induction of long term HBV-specific functional T cells in HLA-A2/HLA-DR1 AAV-HBV persistent mice following single TG1050 immunization.** HLA-A2/HLA-DR1 transgenic mice were intravenously injected with PBS or AAV-HBV (day 0) and immunized one month later (day 32) with either TG1050 or empty Ad. Long term induced HBV-specific immune responses were then assessed 4 months post Adenovirus injection via IFN $\gamma$  ELISPOT assay on spleen cells (**S4A**) and IFN $\gamma$ /TNF $\alpha$ /IL2 ICS assays using spleen cells and liver infiltrating lymphocytes (**S4B and S4C**). HLA-A2 specific peptides were used for *in vitro*

stimulation : SLY for polymerase, ILC and FLP for Core and FLG, VLQ and GLS for Env domains or an irrelevant peptide. Responses observed in the 3 tested groups are represented on 3 separate graphs. For ICS assays, cells were stimulated with a mix of the above mentioned peptides. Results are represented as the percentage of CD8<sup>+</sup> T cells producing at least IFN $\gamma$  or TNF $\alpha$  or IL2.

On each graph (S4B), observed percentages of IFN $\gamma$  or TNF $\alpha$  or IL2 producing cells is represented by a box and whisker plot (encompassing the minimum value, the 25<sup>th</sup> percentile, the median, the 75<sup>th</sup> percentile and the maximum value) The percentage of mice displaying positive response is indicated at the top of the graph.. In addition mean percentage per group of HBV-specific induced CD8<sup>+</sup> T cells producing 1, 2 or 3 of the tested cytokine among cells producing at least one cytokine was represented by pie charts for the 2 groups displaying positive responses ie PBS+TG1050 and AAV-HBV+TG1050 (S4C).

**Figure S5:** Monitoring of HBsAg in HLA-A2/HLA-DR1AAV-HBV mice. HBsAg levels in sera of mice were assessed at different time points post AAV-HBV injection. Data are represented as mean fold changes compared to their respective mean level before TG1050 (Plain circle curve) or empty Ad (empty circle curve) or buffer (cross curve) injection. Statistical differences are indicated by the star ( $p < 0.05$ ; two-way RM ANOVA/ Bonferonni).

**Table S1: Peptide sequences used to recall specific T cells targeting epitopes from the Core Polymerase and Envelope proteins of HBV**

# Supplementary

## Table S1

### HLA-A2 restricted peptides

| Protein | Start Position | End Position | Sequence    | Short name |
|---------|----------------|--------------|-------------|------------|
| Core    | 18             | 27           | FLPSDFFPSV  | FLP        |
|         | 59             | 68           | ILCWGELMTL  | IILC       |
| Env     | 14             | 22           | VLQAGFFLL   | VLQ        |
|         | 20             | 28           | FLL TRI LTI | FLL        |
|         | 41             | 49           | FLGGTTVCL   | FLG        |
|         | 185            | 194          | GLSPTVWLSV  | GLS        |
| Pol     | 803            | 811          | SLYADSPSV   | SLY        |

### H2b restricted peptides

| Protein | Start Position | End Position | Sequence        | Short name |
|---------|----------------|--------------|-----------------|------------|
| Core    | 93             | 100          | MGLKFRQL        | MGL        |
|         | 129            | 143          | PPAYRPPNAPILSTL | P13L       |
| Env     | 179            | 186          | FVQWFVGL        | FVQ        |
|         | 163            | 177          | FLWEWASARFSWLSL | F13L       |
| Pol     | 396            | 404          | FAVNLQSL        | FAV        |
|         | 419            | 428          | VSAAFYHLPL      | VSA        |
|         | 44             | 58           | NLNVSIPWTHKVGNF | N13F       |

### H2d restricted peptides

| Protein | Start Position | End Position | Sequence     | Short name |
|---------|----------------|--------------|--------------|------------|
| Core    | 87             | 85           | SYVNTNMGL    | SYV        |
| Env     | 28             | 39           | IPQSLDSWWTSL | IPQ        |
| Pol     | 140            | 148          | HYFQTRHYL    | HYF        |



# Supplementary

## Figure S1

**A**

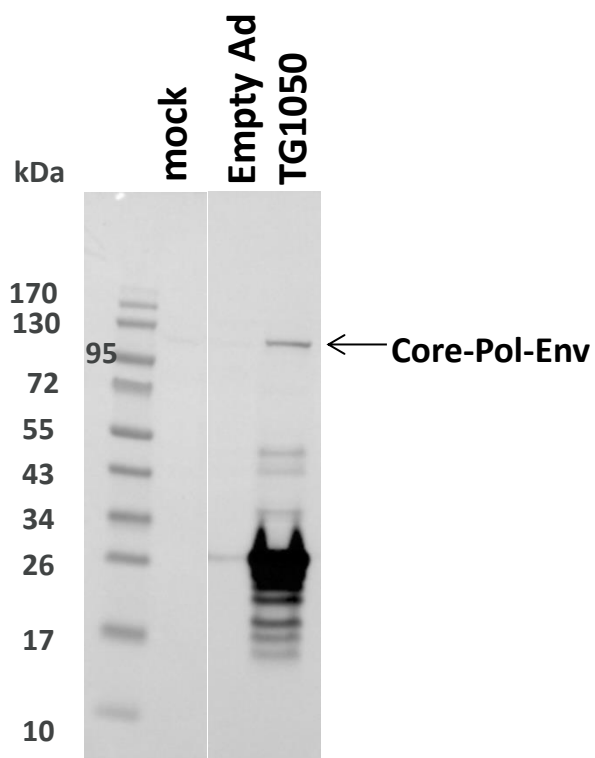

**B**

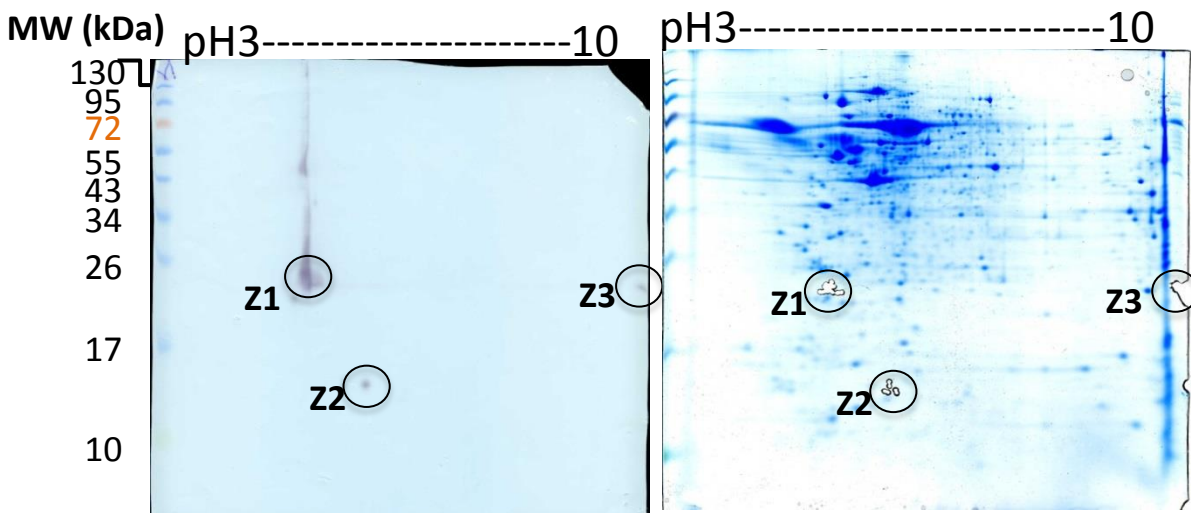

**C**

**Z1**

```

1 MDIDPYKEFG ATVELLSFLP SDFFPSVRDL LDTASALYRE ALESPEHCSP
51 HHTALRQAIL CWGELMTLAT WVGGNLEDPI SRDLVVSYVN TNMGLKFRQL
101 LWFHISCLTF GRETVIEYLV SFGWIRTPP AYRPPNAPIL STLPETTVPL
151 SYQHFRLLL LDDEAGPLEE ELPRLADEGL NRRVAEDLNL GNLNVSIPWT
201 HKVGNFTGLY SSTVPVFNPH .....

```

**Z2**

```

1 MDIDPYKEFG ATVELLSFLP SDFFPSVRDL LDTASALYRE ALESPEHCSP
51 HHTALRQAIL CWGELMTLAT WVGGNLEDPI SRDLVVSYVN TNMGLKFRQL
101 LWFHISCLTF GRETVIEYLV SFGWIRTPP AYRPPNAPIL STLPETTVPL
151 SYQHFRLLL LDDEAGPLEE ELPRLADEGL NRRVAEDLNL GNLNVSIPWT
201 HKVGNFTGLY SSTVPVFNPH .....

```

**Z3**

```

1 MDIDPYKEFG ATVELLSFLP SDFFPSVRDL LDTASALYRE ALESPEHCSP
51 HHTALRQAIL CWGELMTLAT WVGGNLEDPI SRDLVVSYVN TNMGLKFRQL
101 LWFHISCLTF GRETVIEYLV SFGWIRTPP AYRPPNAPIL STLPETTVPL
151 SYQHFRLLL LDDEAGPLEE ELPRLADEGL NRRVAEDLNL GNLNVSIPWT
201 HKVGNFTGLY SSTVPVFNPH .....

```

# Supplementary

## Figure S2

Empty Ad

TG1050

A

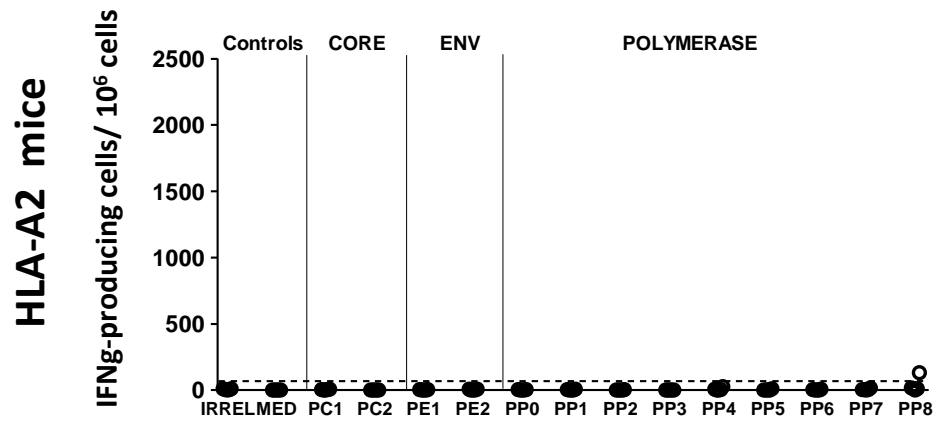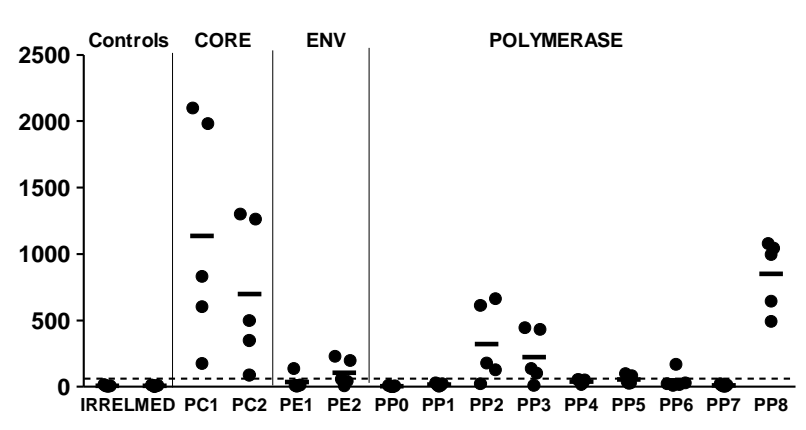

B

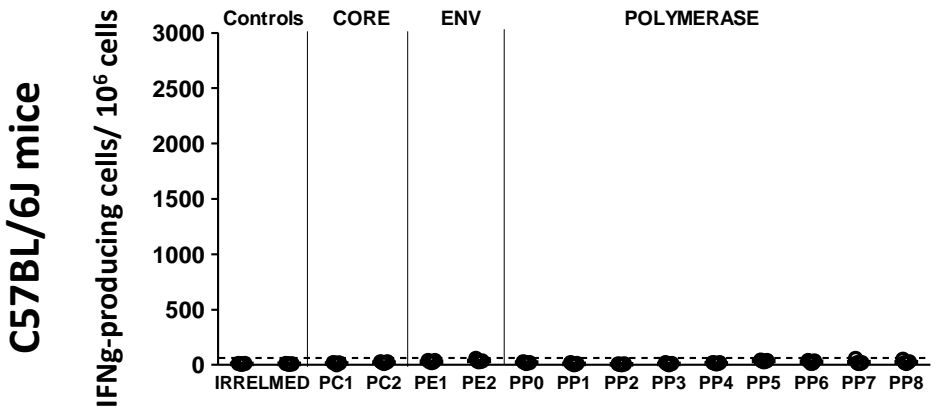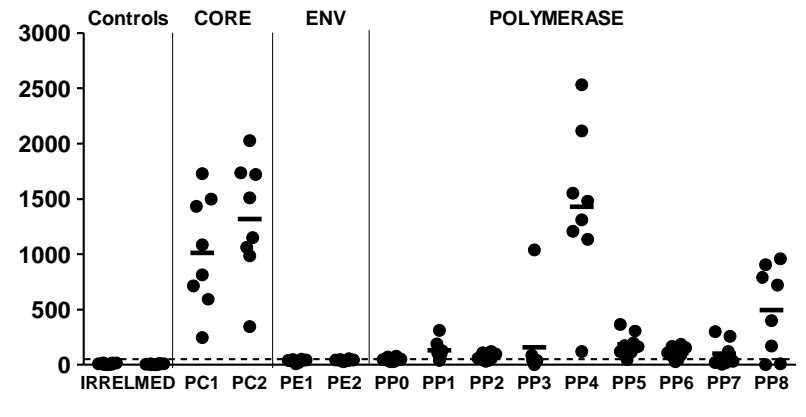

C

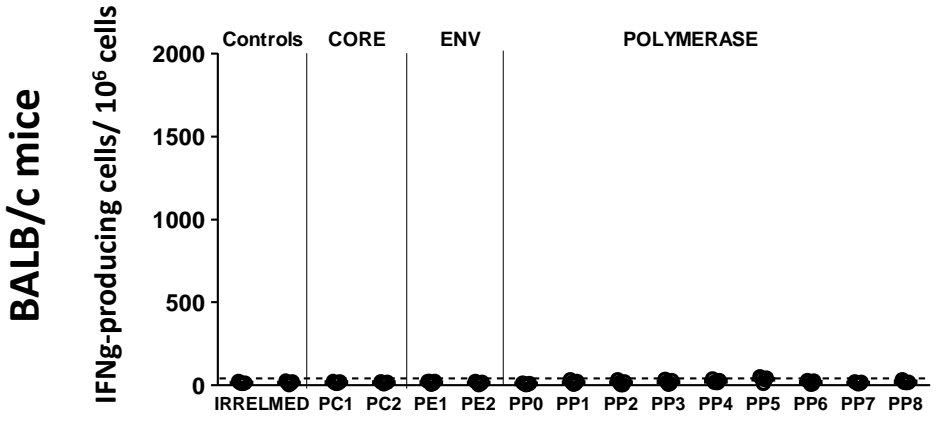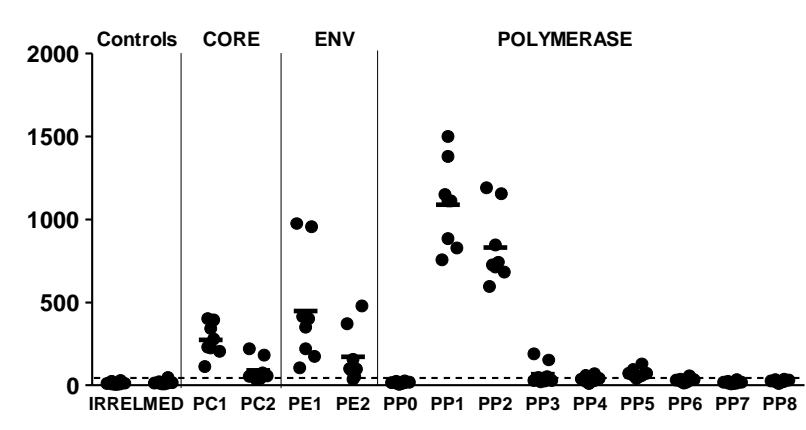

# Supplementary

## Figure S3

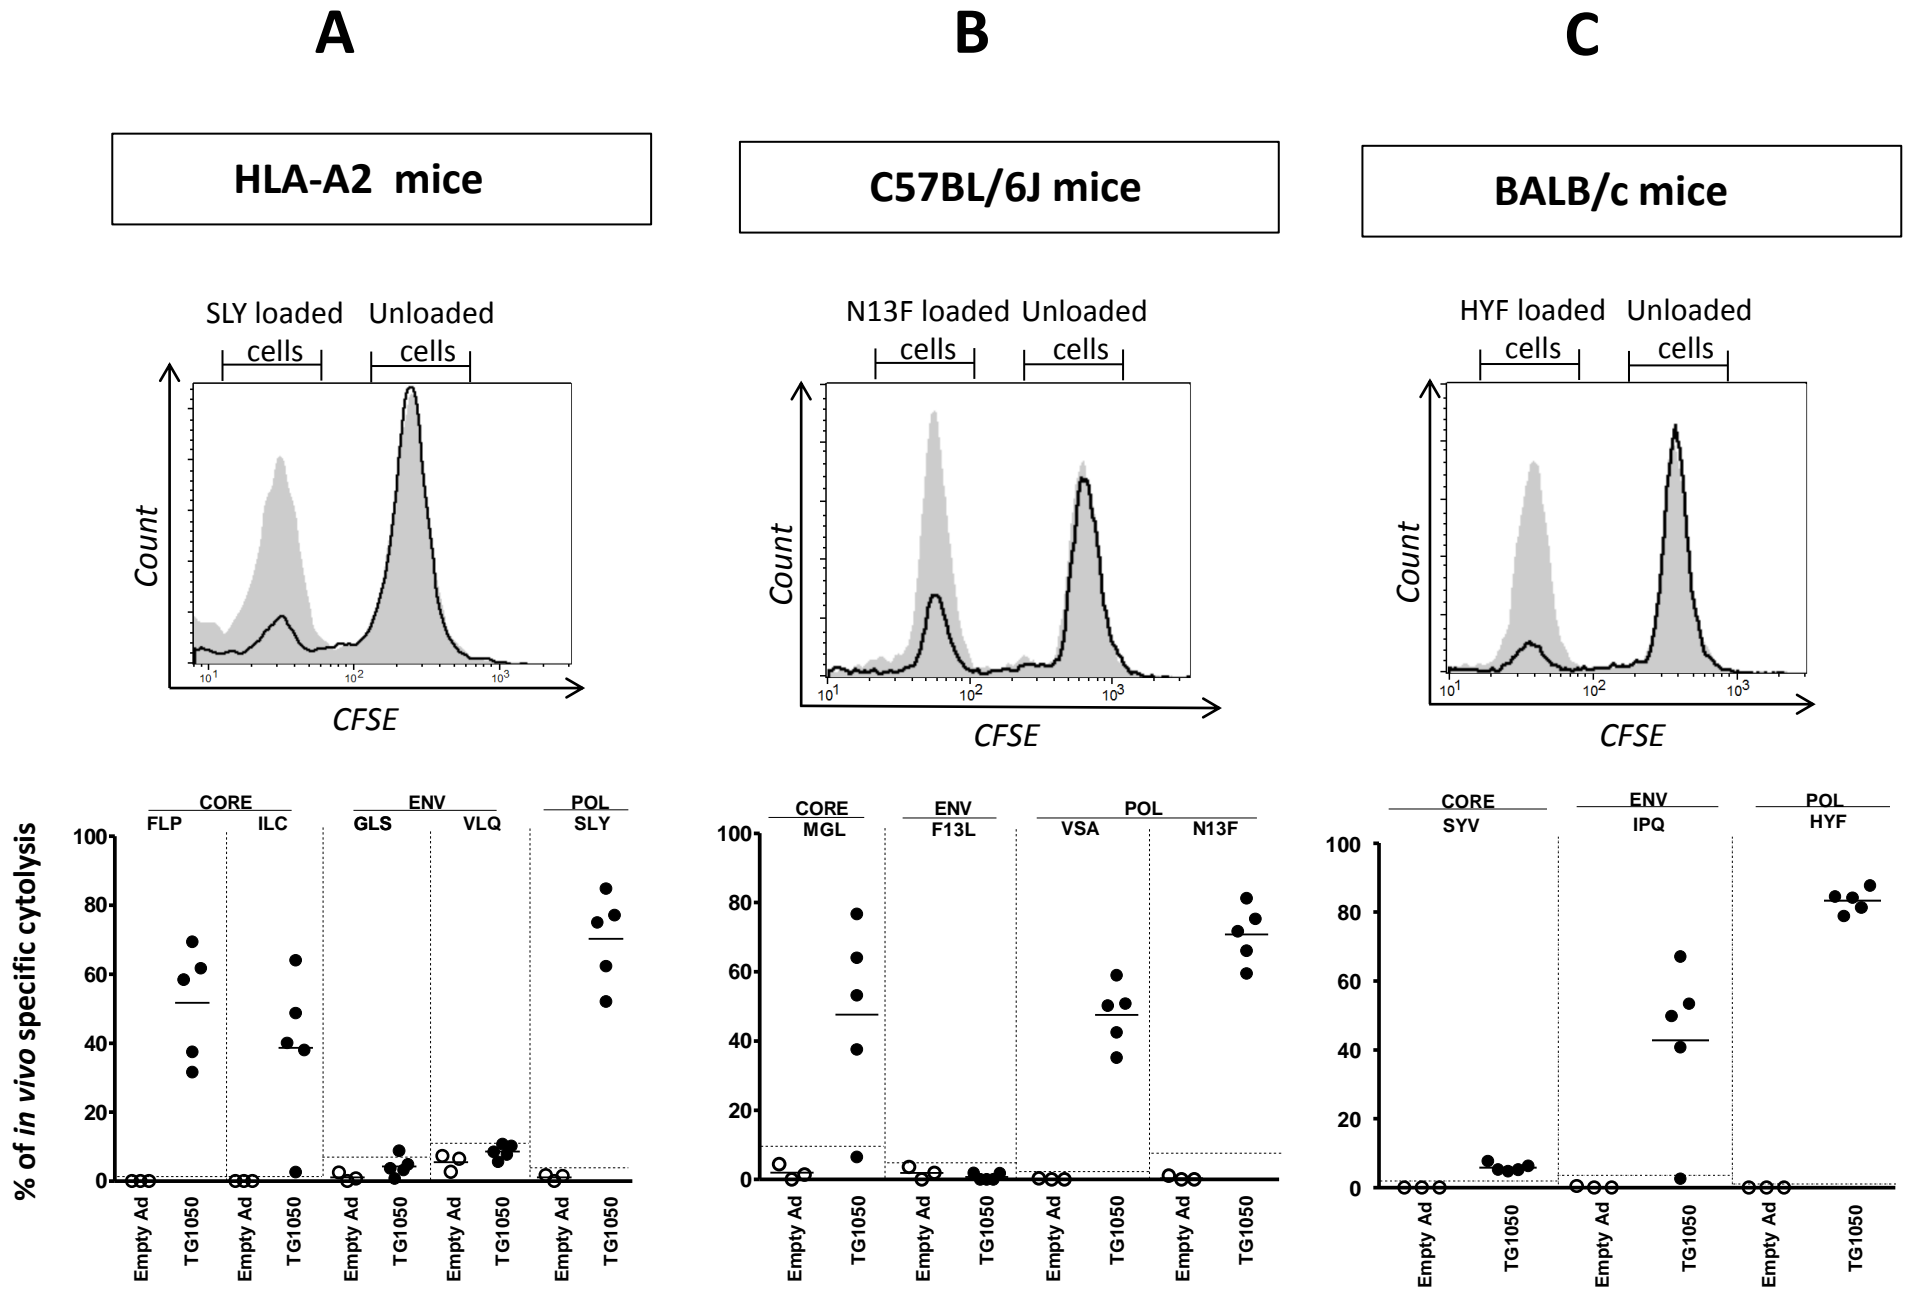

# Supplementary

## Figure S4

Average HBV DNA titers at D28 : 588 IU/mL  
Average HBsAg titers at D28 : 7  $\mu$ g/mL

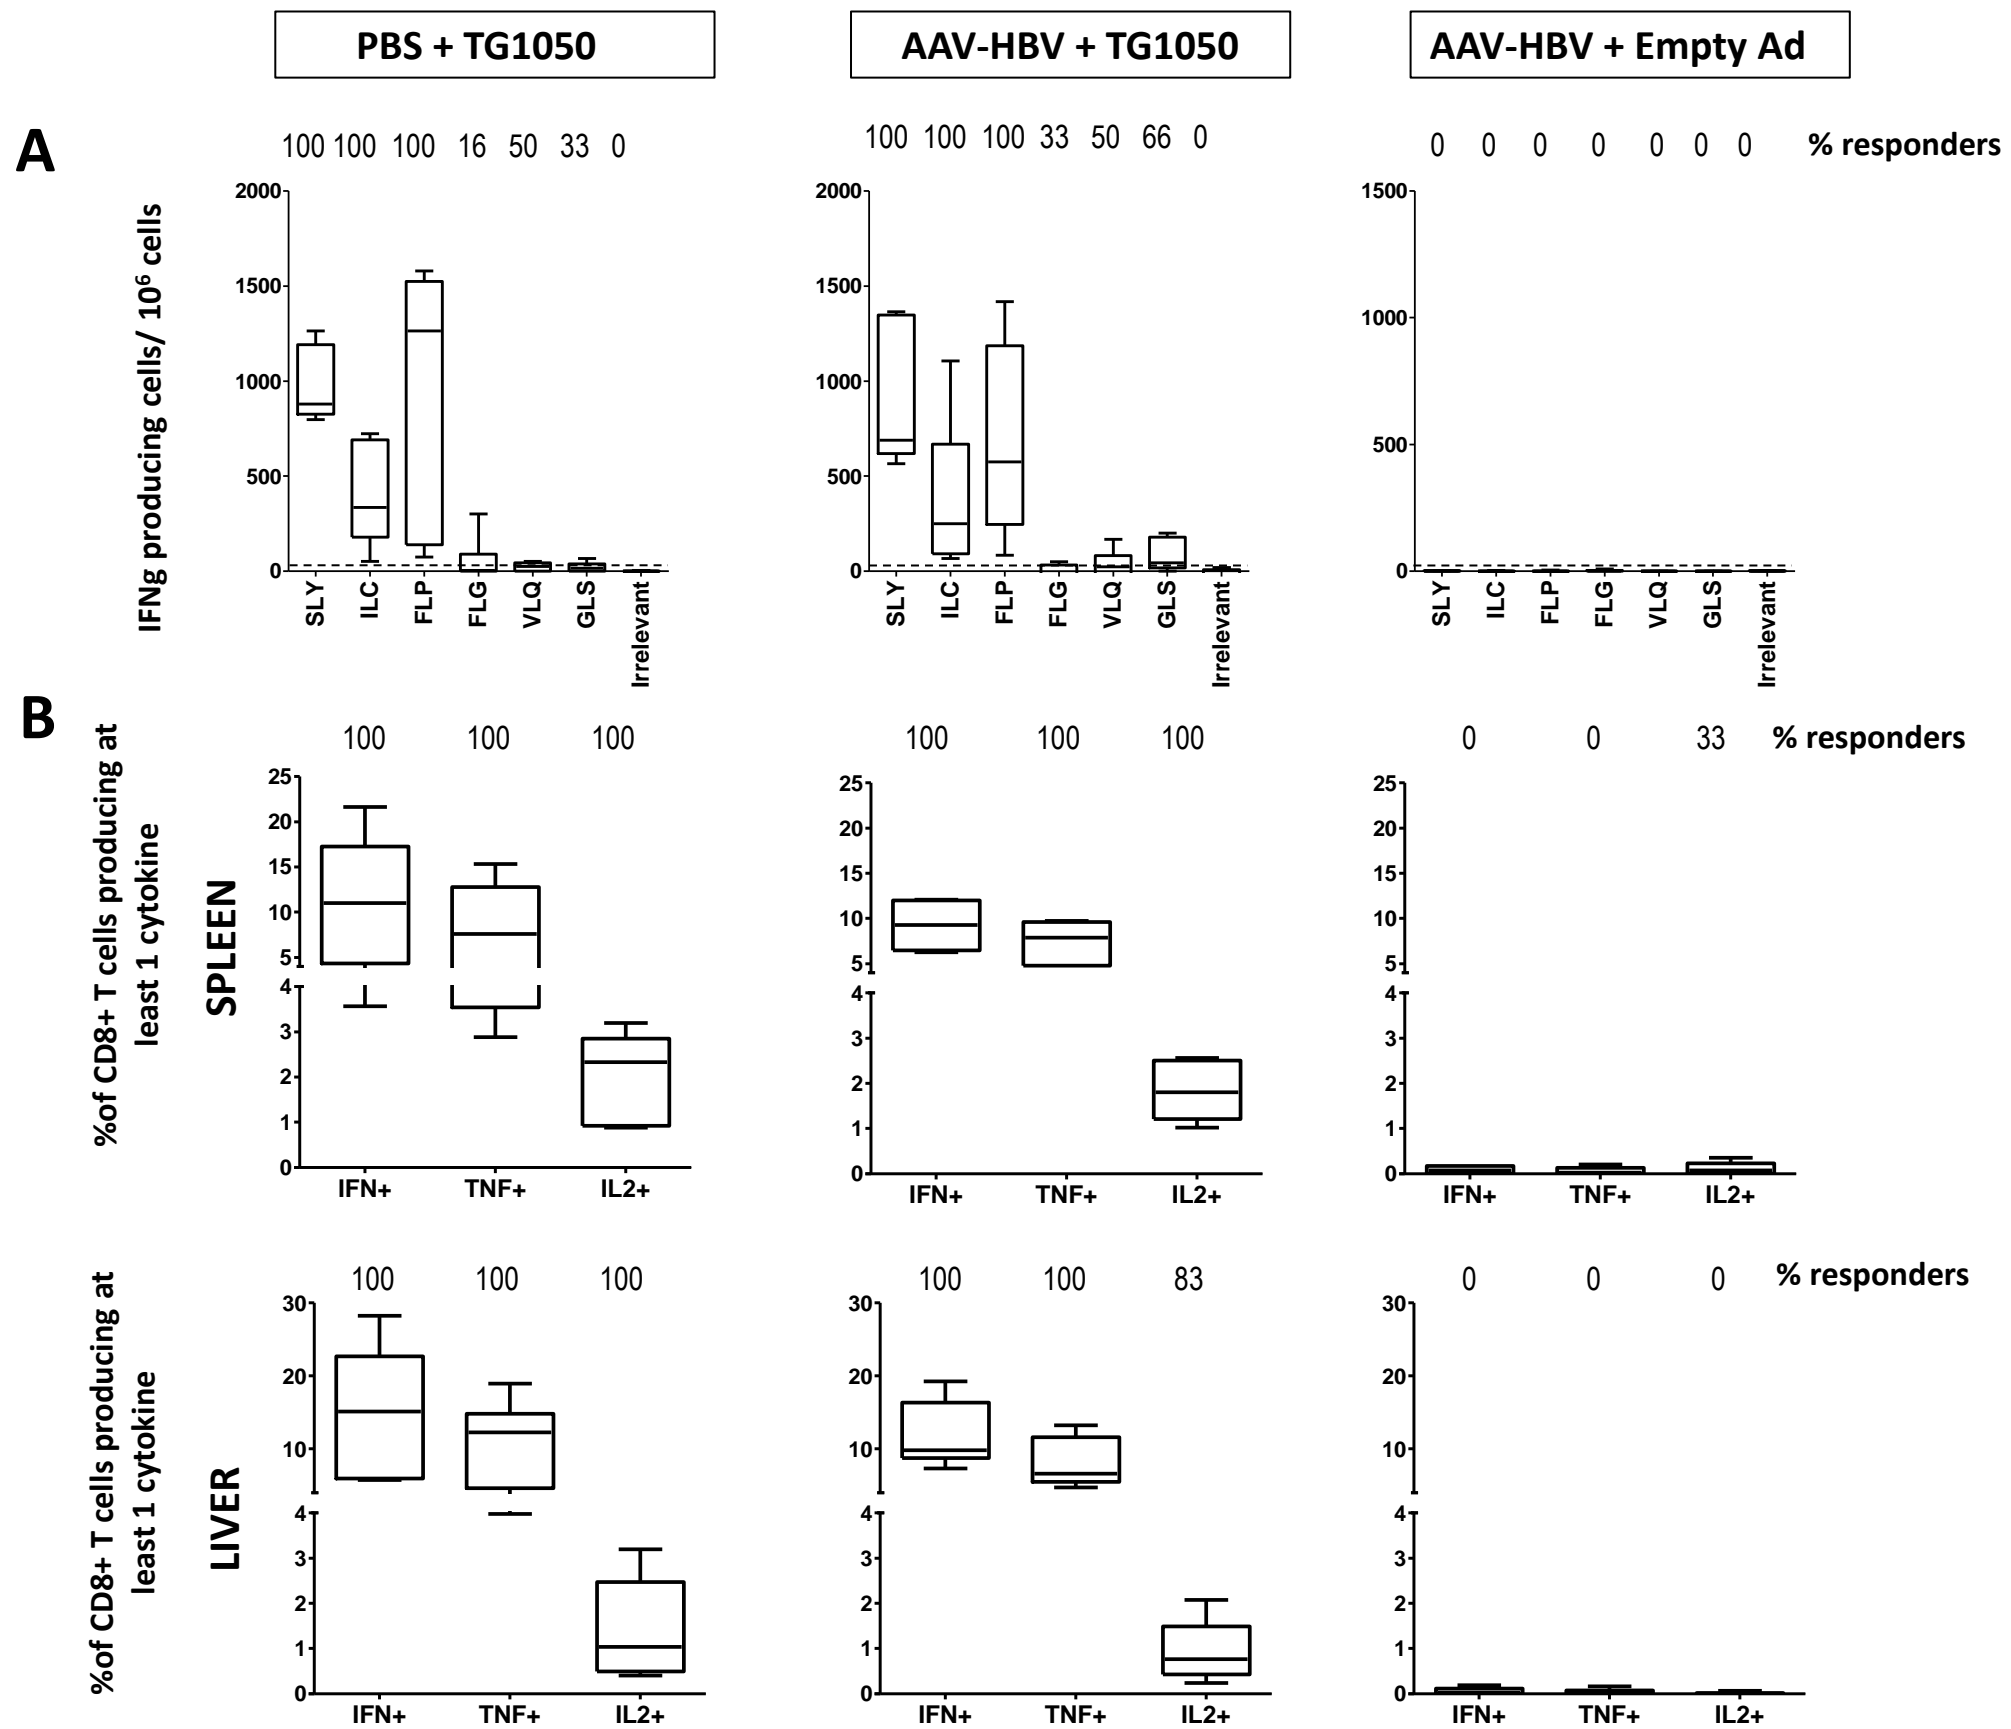

# Supplementary

## Figure S4 (continuation)

C

Long-term experiment

SPLEENS

LIVERS

PBS + TG1050

AAV-HBV + TG1050

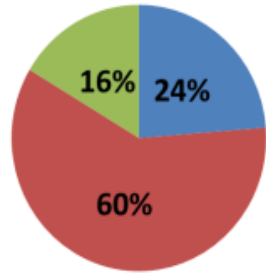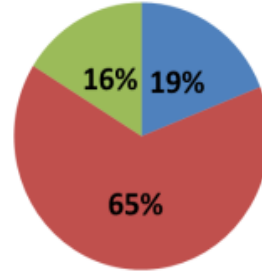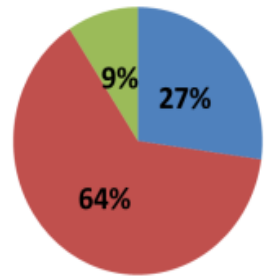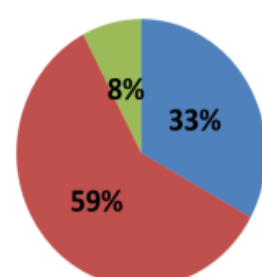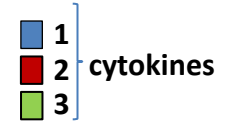

# Supplementary

## Figure S5

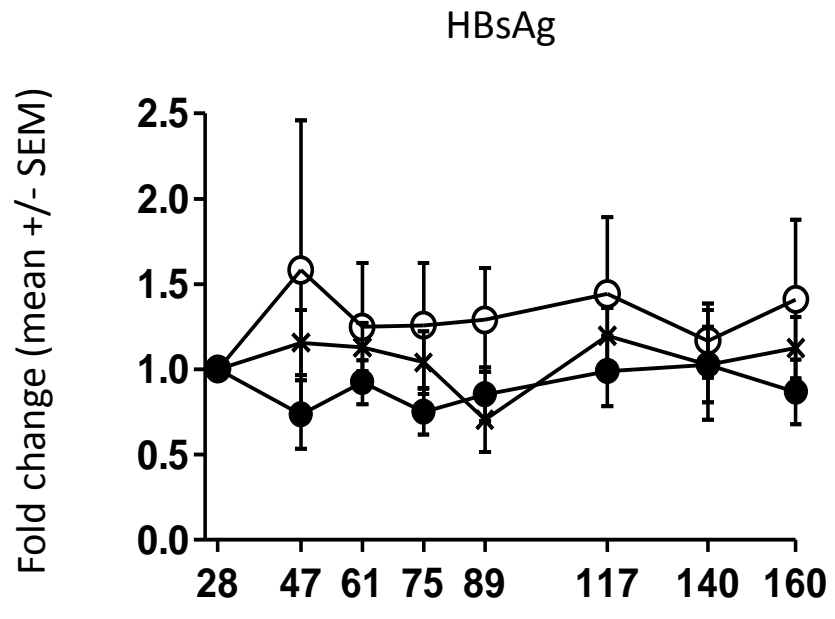

Supplement: gutjnl-2014-308041-s1.pdf [file gutjnl-2014-308041-s1.pdf]
